# Supplementary material for: Anti-allergic Effects Of Fertilized Red Ginseng Marc On 2,4-dinitrochlorobenzene-induced Atopic Dermatitis-like Mice Model
Source: Preprints.org preprint supplement (doi:10.20944/preprints202202.0131.v1), 2022-02-09
Supplement: Supplementary file 3 [file supplementary]

**Table S1. Primers used for RT-qPCR analysis**

| **Targets** | **Sequence (5’ to 3’)** |
| --- | --- |
| TNF-α | Forward: CCT GTA GCC CAC GTC GTA GC  Reverse: TTG ACC TCA GCG CTG AGT TG |
| IL-4 | Forward: GAA TGT ACC AGG AGC CAT ATC  Reverse: CTC AGT ACT ACG AGT AAT CCA |
| IL-5 | Forward: TCA CCG AGC TCT GTT GAC AA  Reverse: CCA CAC TTC TCT TTT TGG CG |
| IL-13 | Forward: GAC CCA GAG GAT ATT GCA TG  Reverse: CCA GCA AAG TCT GAT GTG AG |
| GAPDH | Forward: CAT CTT CCA GGA GCG AGA CC  Reverse: AAG CCA TGC CAA TGT TGT CT |

GAPDH = glyceraldehyde 3-phosphate dehydrogenase, IL = interleukin, TNF = tumor necrosis factor

**Figure S1. Organ weights of the spleen and lymph node (LN)**


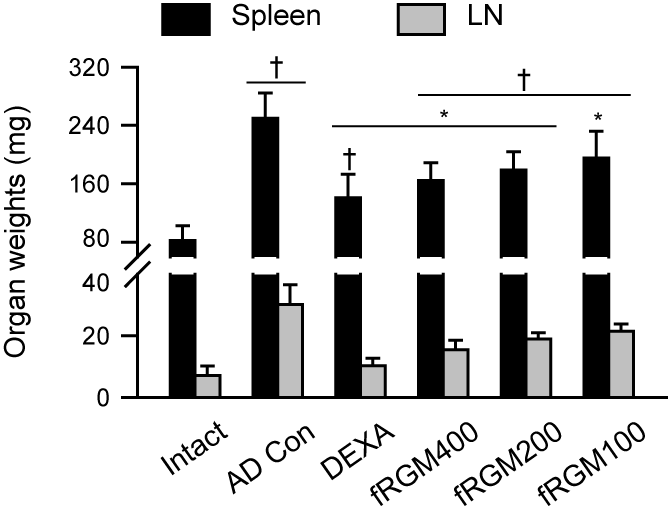


Values are represented as the means ± standard deviations. †: p < 0.05 vs. the Intact group; *: p < 0.05 vs. the AD Con.
